# Supplementary material for: Development and characterisation of starch/alginate active films incorporated with lemongrass essential oil ( Cymbopogon citratus )
Source: Royal Society of Chemistry journal article supplement (doi:10.1039/d4ma00608a), 2024-01-01
Supplement: d4ma00608a1.pdf [file d4ma00608a1.pdf]

Supplementary Information

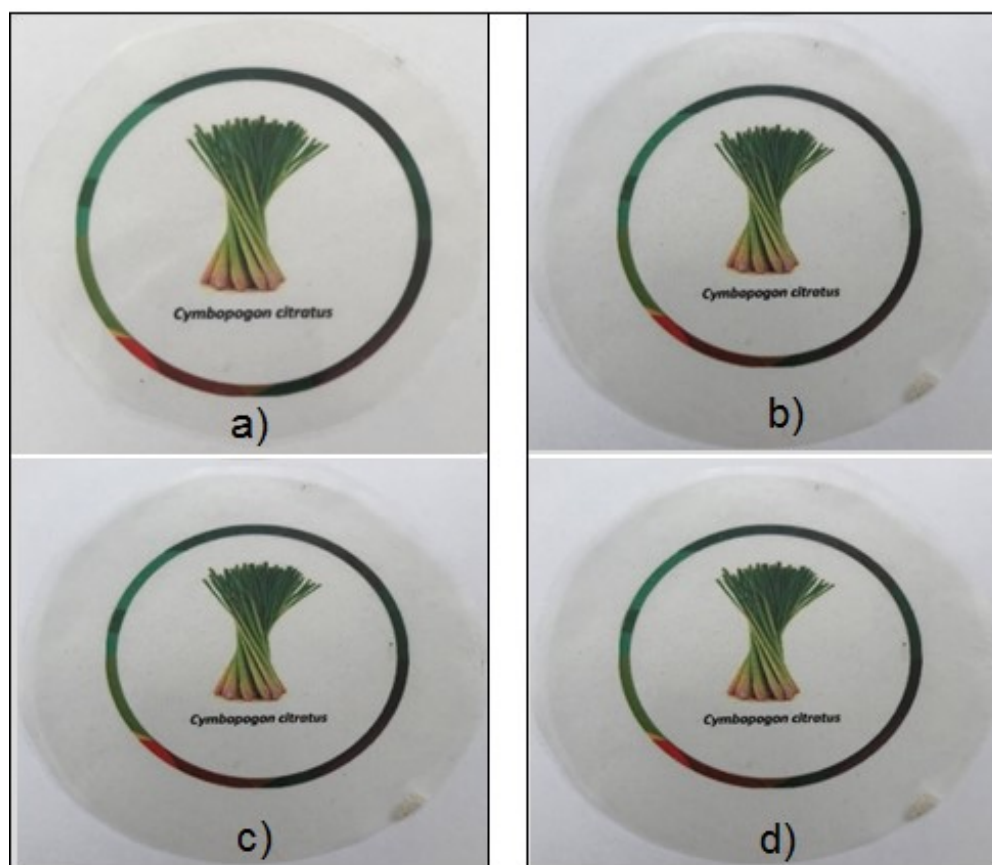

**Fig. 1.** Visual appearance of the films a) CF, b) FLEO-0.5%, c) FLEO-1.0%, d) FLEO-1.5%

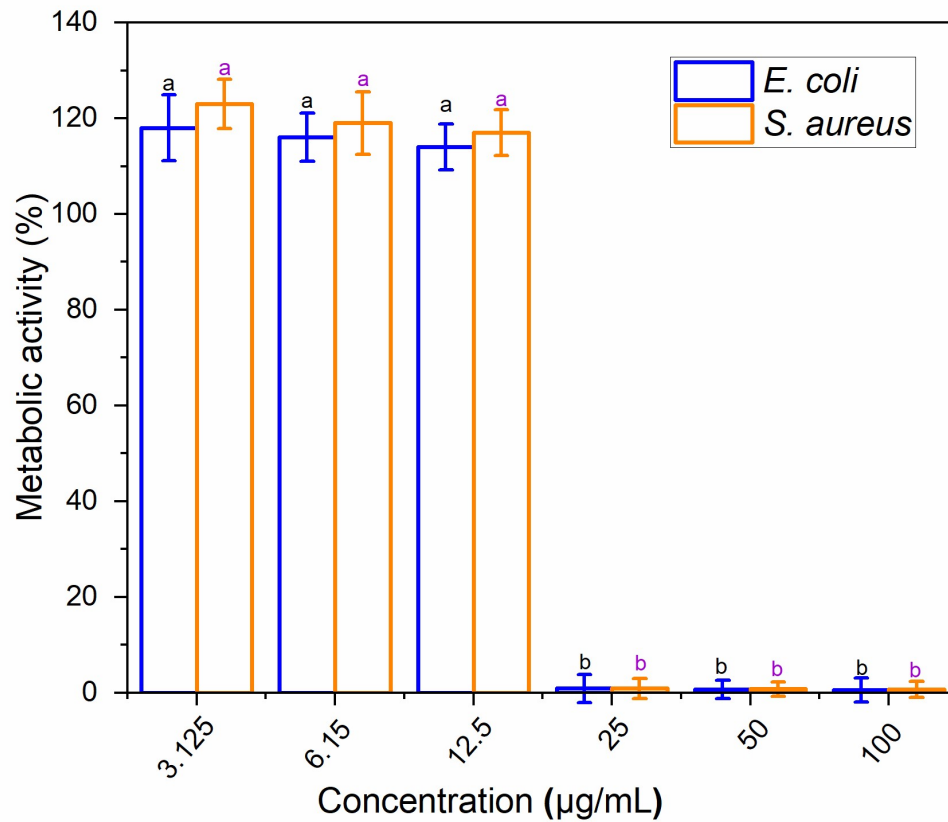

**Fig. 2.** Minimum inhibitory concentration (MIC) of lemongrass essential oil (LEO) at different concentrations (3.125 - 100 µg/mL) against *S. aureus* and *E. coli*. Data shown represent mean ± standard deviation. Different letters on the bars indicate significant differences between groups ( $p < 0.05$ ) based on ANOVA followed by Tukey test.

The MIC values obtained for LEO against *S. aureus*

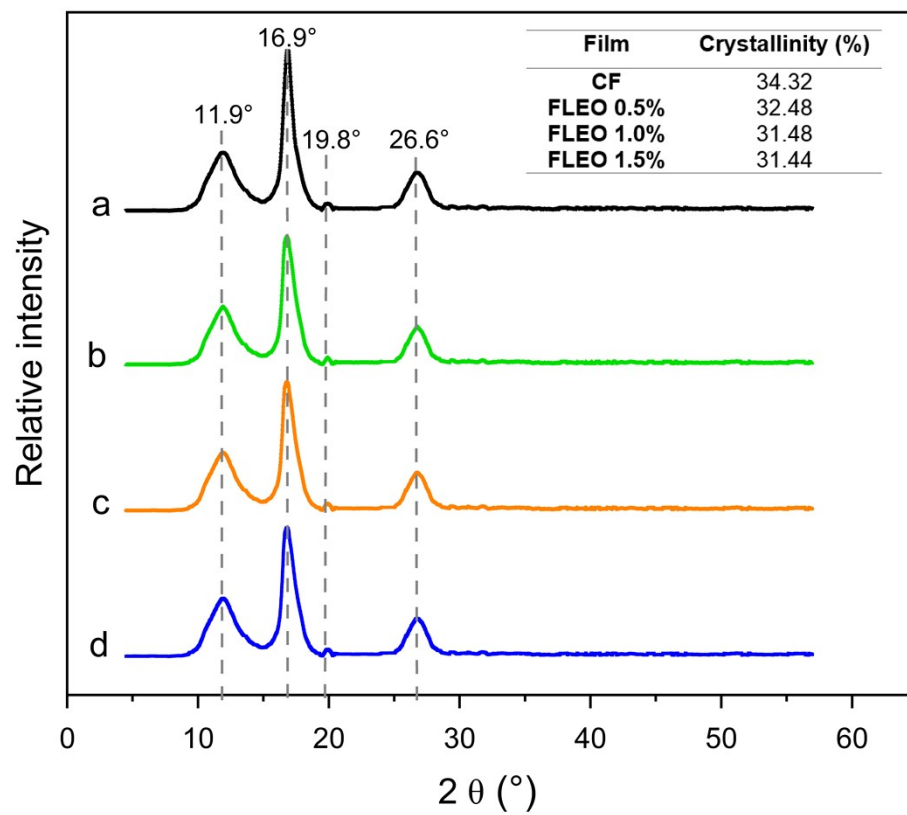

**Fig. 3.** XRD patterns of the films a) CF b) FLEO-0.5%, c) FLEO-1.0% and d) FLEO-1.5%.

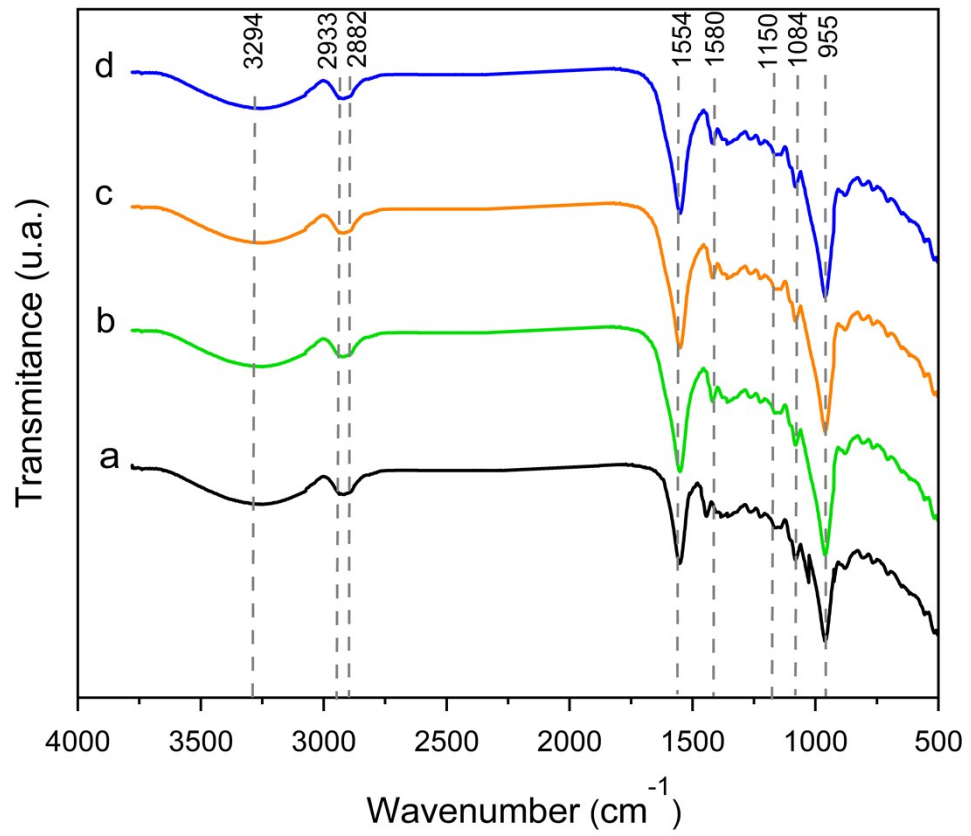

**Fig. 4.** FTIR spectra of the films a) CF, b) FLEO-0.5%, c) FLEO-1.0 and, d) FLEO-1.5%.

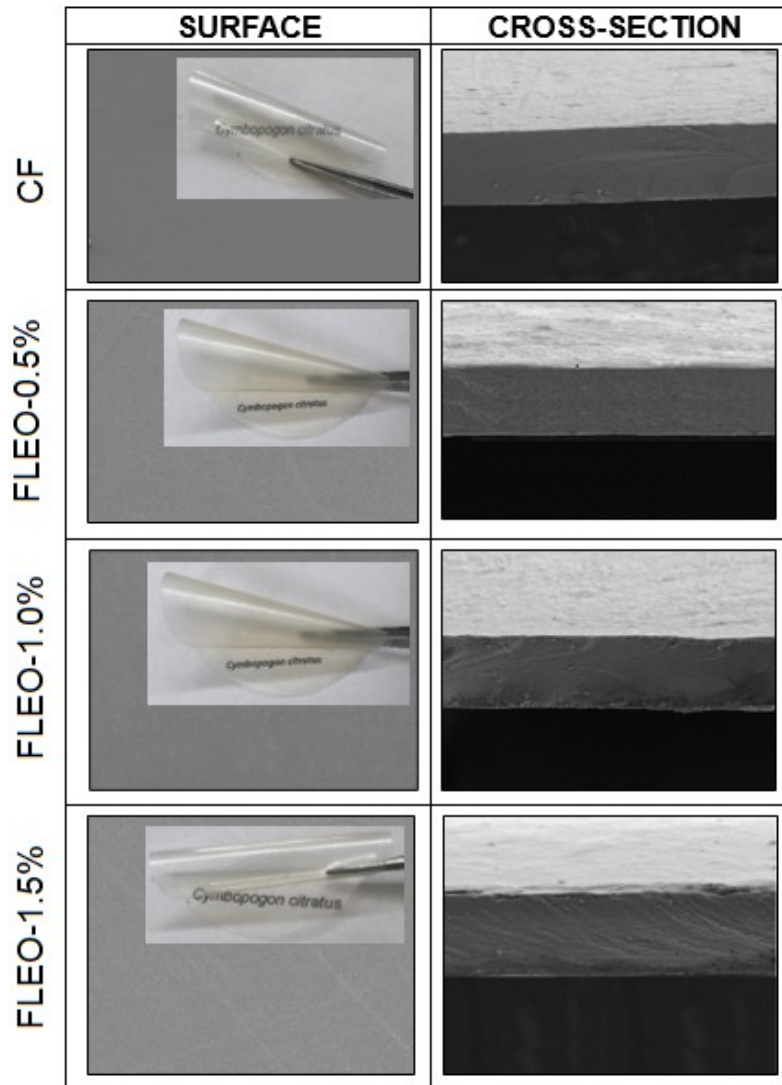

**Fig. 5.** SEM images of the surface (left column) and the cross-sections (right column) of the film CF, FLEO-0.5%, FLEO-1.0% and FLEO-1.5%.

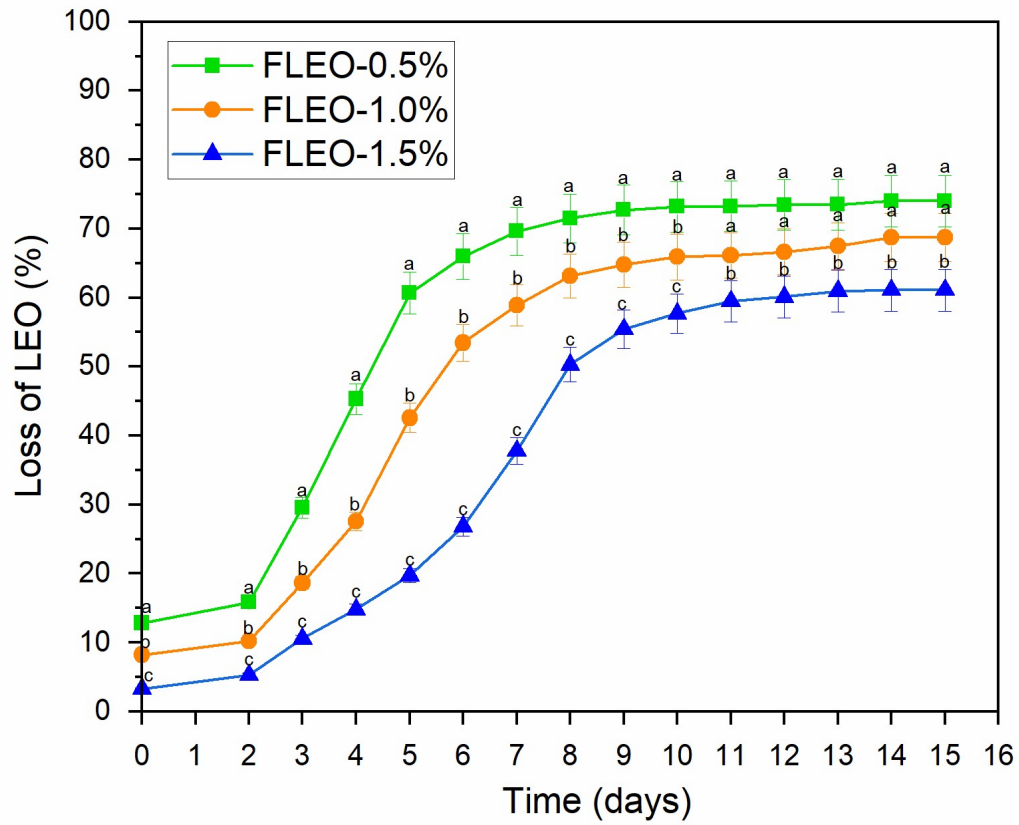

**Fig. 6.** Loss of lemongrass essential oil (LEO) from the films a) FLEO-0.5%, b) FLEO-1.0% and c) FLEO-1.5%. Different letters on the bars indicate significant differences between treatments ( $p < 0.05$ ).

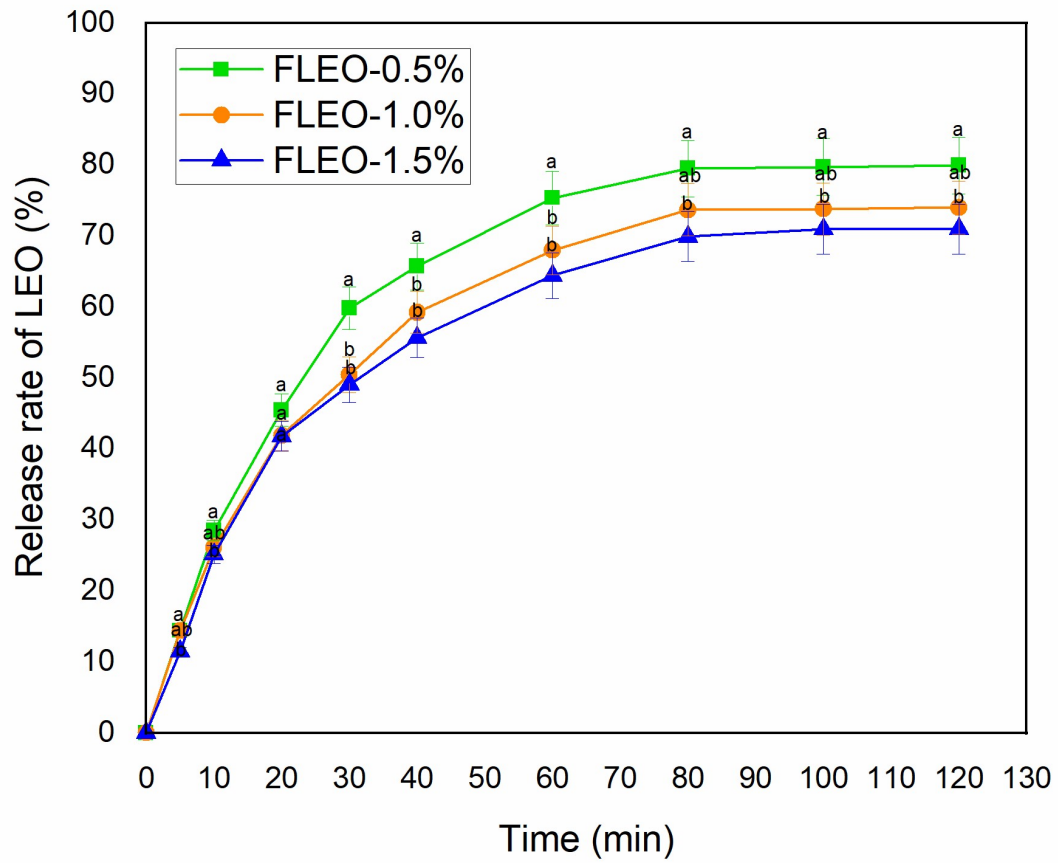

**Fig. 7.** Release profile of lemongrass essential oil (LEO) from the films a) FLEO-0.5%, b) FLEO-1.0% and c) FLEO-1.5%. Different letters on the bars indicate significant differences between treatments ( $p < 0.05$ ).

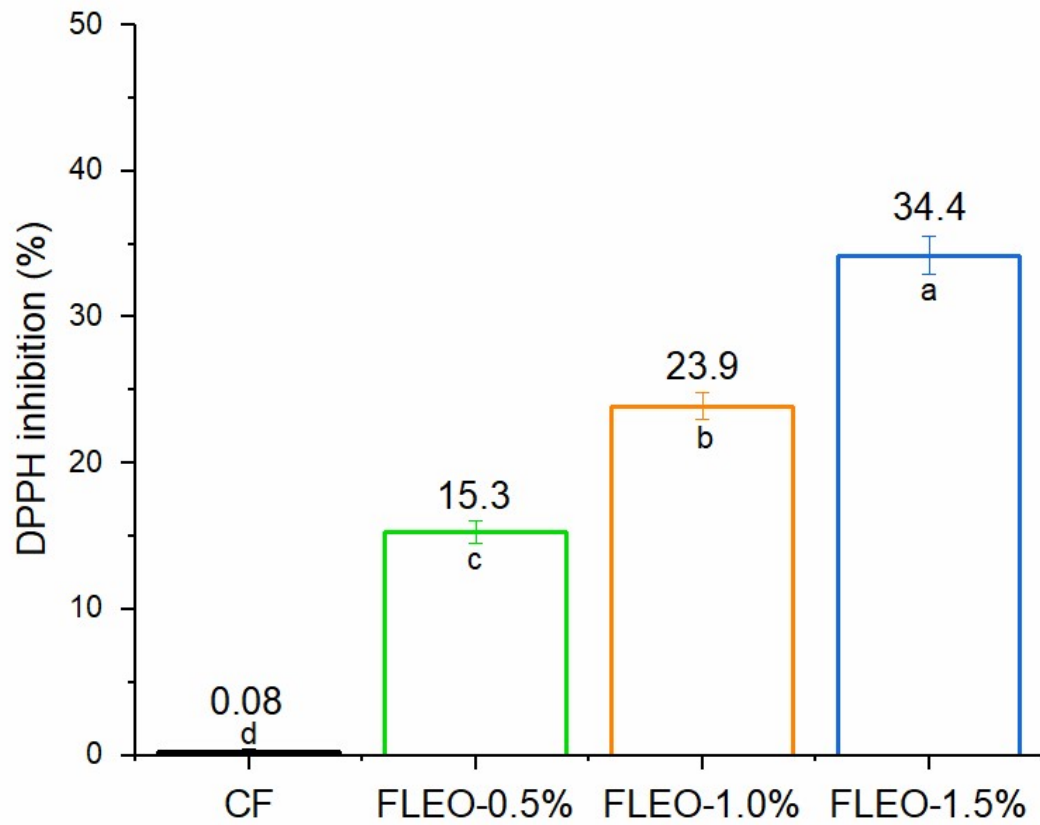

**Fig. 8.** DPPH inhibition activity of the films containing or not different concentrations of lemongrass essential oil (LEO). Different letters on the bars indicate significant differences between treatments ( $p < 0.05$ ).



**Table 1.** Compounds identified of lemongrass essential oil (LEO)

| Compound                                            | Retention time (min) | Relative content (%) |                                                                 |       |       |
|-----------------------------------------------------|----------------------|----------------------|-----------------------------------------------------------------|-------|-------|
| 5-Hepten-2-one, 6-methyl-                           | 5.29                 | 0.94                 | cis-2,6-Dimethyl-2,6-octadiene                                  | 16.82 | 0.71  |
| $\alpha$ -Sabinene                                  | 5.42                 | 0.10                 | Geranyl Acetate                                                 | 17.71 | 2.30  |
| $\beta$ -Myrcene                                    | 5.62                 | 0.25                 | Trans-Nerolidol                                                 | 18.03 | 0.08  |
| 1S- $\alpha$ -Pinene                                | 6.10                 | 0.22                 | (-)- $\beta$ -Elemene                                           | 18.26 | 0.38  |
| Limonene                                            | 6.50                 | 2.79                 | Caryphyllene                                                    | 19.15 | 2.83  |
| (E)- $\beta$ -Ocimene                               | 6.57                 | 0.49                 | 4,7,10-Cycloundecatriene, 1,1,4,8-tetramethyl-, cis, cics, cis- | 19.99 | 0.36  |
| (Z)- $\beta$ -Ocimene                               | 6.81                 | 0.26                 | Germacrene D                                                    | 20.76 | 0.44  |
| Phenol, m-tert-butyl-                               | 8.34                 | 0.08                 | $\alpha$ -Muurolene                                             | 21.33 | 0.14  |
| Linalool                                            | 8.06                 | 0.67                 | $\gamma$ -Muurolene                                             | 21.74 | 0.21  |
| Cis-rose oxide                                      | 8.34                 | 0.09                 | $\delta$ -Cadinene                                              | 22.06 | 0.70  |
| Cyclohexene, 3,3,5-trimethyl-                       | 8.99                 | 0.13                 | $\alpha$ -Elemol                                                | 22.84 | 0.64  |
| 1,4-Hexadiene, 3,3,5-trimethyl-                     | 9.29                 | 0.38                 | 1-Hydroxy-1,7-dimethyl-4-isopropyl-2,7-cyclodecadiene           | 23.95 | 0.71  |
| (R)-(+)-Citronellal                                 | 9.68                 | 4.74                 | Caryophyllene oxide                                             | 24.06 | 0.62  |
| 3-Decyne                                            | 9.98                 | 1.40                 | 3-Octyne, 7-methyl-                                             | 25.02 | 0.10  |
| Imidazole, 5-[N(2)-(isopropylidene)carbohydrano]-   | 10.33                | 0.06                 | $\gamma$ -Eudesmol                                              | 26.19 | 0.07  |
| Cyclohexanone, 5-methyl-2-(1-methylethenyl)-, trans | 10.63                | 1.86                 | $\tau$ -Muurolol                                                | 26.61 | 0.43  |
| 1, 11-Dodecadiene                                   | 10.91                | 0.02                 | $\beta$ -Eusdemol                                               | 26.90 | 0.05  |
| Decanal                                             | 11.50                | 0.26                 | $\alpha$ -Cadinol                                               | 27.16 | 0.55  |
| (R)-(+)- $\beta$ -Citronellol                       | 13.40                | 34.47                | 7-Octen-1-ol, 2,6-dimethyl-                                     | 34.04 | 0.07  |
| Citral                                              | 14.71                | 39.12                | 1,5,9-Decatriene. 2,3,5,8-tetramethyl-                          | 37.83 | 0.04  |
|                                                     |                      |                      | Neoisolongifolene, 8-bromo-                                     | 41.47 | 0.06  |
|                                                     |                      |                      | Total                                                           |       | 99.82 |

**Table 2.** Thickness and mechanical properties of the films containing or not different concentrations of lemongrass oil essential (LEO).

| <b>Film</b>      | <b>Thickness (mm)</b>   | <b>TS (MPa)</b>        | <b>EB (%)</b>           |
|------------------|-------------------------|------------------------|-------------------------|
| <b>CF</b>        | 0.107±0.03 <sup>a</sup> | 2.15±0.57 <sup>a</sup> | 14.08±1.57 <sup>a</sup> |
| <b>FLEO 0.5%</b> | 0.095±0.01 <sup>a</sup> | 1.49±0.43 <sup>b</sup> | 11.85±1.18 <sup>b</sup> |
| <b>FLEO 1.0%</b> | 0.090±0.02 <sup>a</sup> | 1.35±0.09 <sup>c</sup> | 10.78±1.26 <sup>b</sup> |
| <b>FLEO 1.5%</b> | 0.107±0.03 <sup>a</sup> | 1.31±0.60 <sup>d</sup> | 10.57±1.05 <sup>b</sup> |

Data reported are mean values ± standard deviation.

Median on the same column with different letters are significantly different (Tukey:  $p < 0.05$ ).

**Table 3.** Water vapour permeability (WVP), moisture content and solubility of the films containing or not different concentrations of lemongrass oil essential (LEO).

| <b>Film</b>      | <b>WVP (x 10<sup>-9</sup><br/>g s<sup>-1</sup>m<sup>-1</sup>Pa<sup>-1</sup>)</b> | <b>Moisture<br/>Content (%)</b> | <b>Solubility (%)</b>   |
|------------------|----------------------------------------------------------------------------------|---------------------------------|-------------------------|
| <b>CF</b>        | 7.81±0.52 <sup>a</sup>                                                           | 20.34±0.50 <sup>a</sup>         | 85.05±0.91 <sup>a</sup> |
| <b>FLEO 0.5%</b> | 6.92±0.38 <sup>b</sup>                                                           | 18.41±0.33 <sup>b</sup>         | 78.72±0.78 <sup>b</sup> |
| <b>FLEO 1.0%</b> | 6.87±0.25 <sup>b</sup>                                                           | 17.95±0.40 <sup>c</sup>         | 73.30±1.32 <sup>c</sup> |
| <b>FLEO 1.5%</b> | 6.84±0.30 <sup>b</sup>                                                           | 17.76±0.20 <sup>c</sup>         | 69.34±1.23 <sup>d</sup> |

Data reported are mean values ± standard deviation.

Median on the same column with different letters are significantly different (Tukey: p < 0.05).

**Table 4.** CIELAB colour parameters and opacity of the films containing or not different concentrations of lemongrass oil essential (LEO).

| <b>Film</b>      | <b>L*</b>               | <b>a*</b>              | <b>b*</b>               | <b>Opacity (%)</b>      |
|------------------|-------------------------|------------------------|-------------------------|-------------------------|
| <b>CF</b>        | 56.77±0.06 <sup>a</sup> | 1.10±0.10 <sup>a</sup> | 16.37±0.12 <sup>a</sup> | 78.37±0.60 <sup>a</sup> |
| <b>FLEO 0.5%</b> | 55.63±0.11 <sup>b</sup> | 1.09±0.08 <sup>a</sup> | 16.53±0.10 <sup>b</sup> | 78.12±0.16 <sup>a</sup> |
| <b>FLEO 1.0%</b> | 55.57±0.15 <sup>b</sup> | 1.10±0.00 <sup>a</sup> | 16.60±0.16 <sup>b</sup> | 79.01±1.00 <sup>b</sup> |
| <b>FLEO 1.5%</b> | 55.20±0.17 <sup>c</sup> | 1.10±0.06 <sup>a</sup> | 17.17±0.23 <sup>c</sup> | 79.59±0.93 <sup>b</sup> |

Data reported are mean values ± standard deviation.

Median on the same column with different letters are significantly different (Tukey:  $p < 0.05$ ).

**Table 5.** Antibacterial activity of the films containing or not different concentrations of lemongrass essential oil (LEO) against *S. aureus*. and *E. coli*.

| Film      | Inhibition zone (mm)    |                         |
|-----------|-------------------------|-------------------------|
|           | <i>S. aureus</i>        | <i>E. coli</i>          |
| CF        | 0.0 <sup>a</sup>        | 0.0 <sup>a</sup>        |
| FLEO 0.5% | 15.92±1.03 <sup>b</sup> | 13.96±0.98 <sup>b</sup> |
| FLEO 1.0% | 17.13±1.09 <sup>c</sup> | 14.10±1.12 <sup>b</sup> |
| FLEO 1.5% | 19.24±1.18 <sup>d</sup> | 16.06±1.27 <sup>c</sup> |

Data reported are mean values ± standard deviation.

Median on the same column with different letters are significantly different (Tukey:  $p < 0.05$ ).
